# Supplementary material for: 13C-NMR quantification of proton exchange at LewisX hydroxyl groups in water
Source: Royal Society of Chemistry journal article supplement (doi:10.1039/c1cc13310a), 2011-01-01

## *Supporting Information 2-2*

# **$^{13}\text{C}$ -NMR quantification of rapid proton exchange at LewisX hydroxyl groups in water**

Shinya Hanashima,<sup>1</sup> Koichi Kato,<sup>2,3</sup> Yoshiki Yamaguchi<sup>1</sup>

*1. Structural Glycobiology Team, Systems Glycobiology Research Group, RIKEN Advanced Science Institute, 2-1 Hirosawa, Wako-shi, Saitama 351-0198, Japan.*

*2. Department of Structural Biology and Biomolecular Engineering, Graduate School of Pharmaceutical Sciences, Nagoya City University, 3-1 Tanabe-dori, Mizuho-ku, Nagoya 467-8603, Japan.*

*3. Okazaki Institute for Integrative Bioscience and Institute for Molecular Science, National Institutes of Natural Sciences, 5-1 Higashiyama, Myodaiji, Okazaki 444-8787, Japan.*

e-mail: yyoshiki@riken.jp

**$^1\text{H}$ - and  $^{13}\text{C}$ -NMR spectra of compounds 5, 7, 9 and 1**

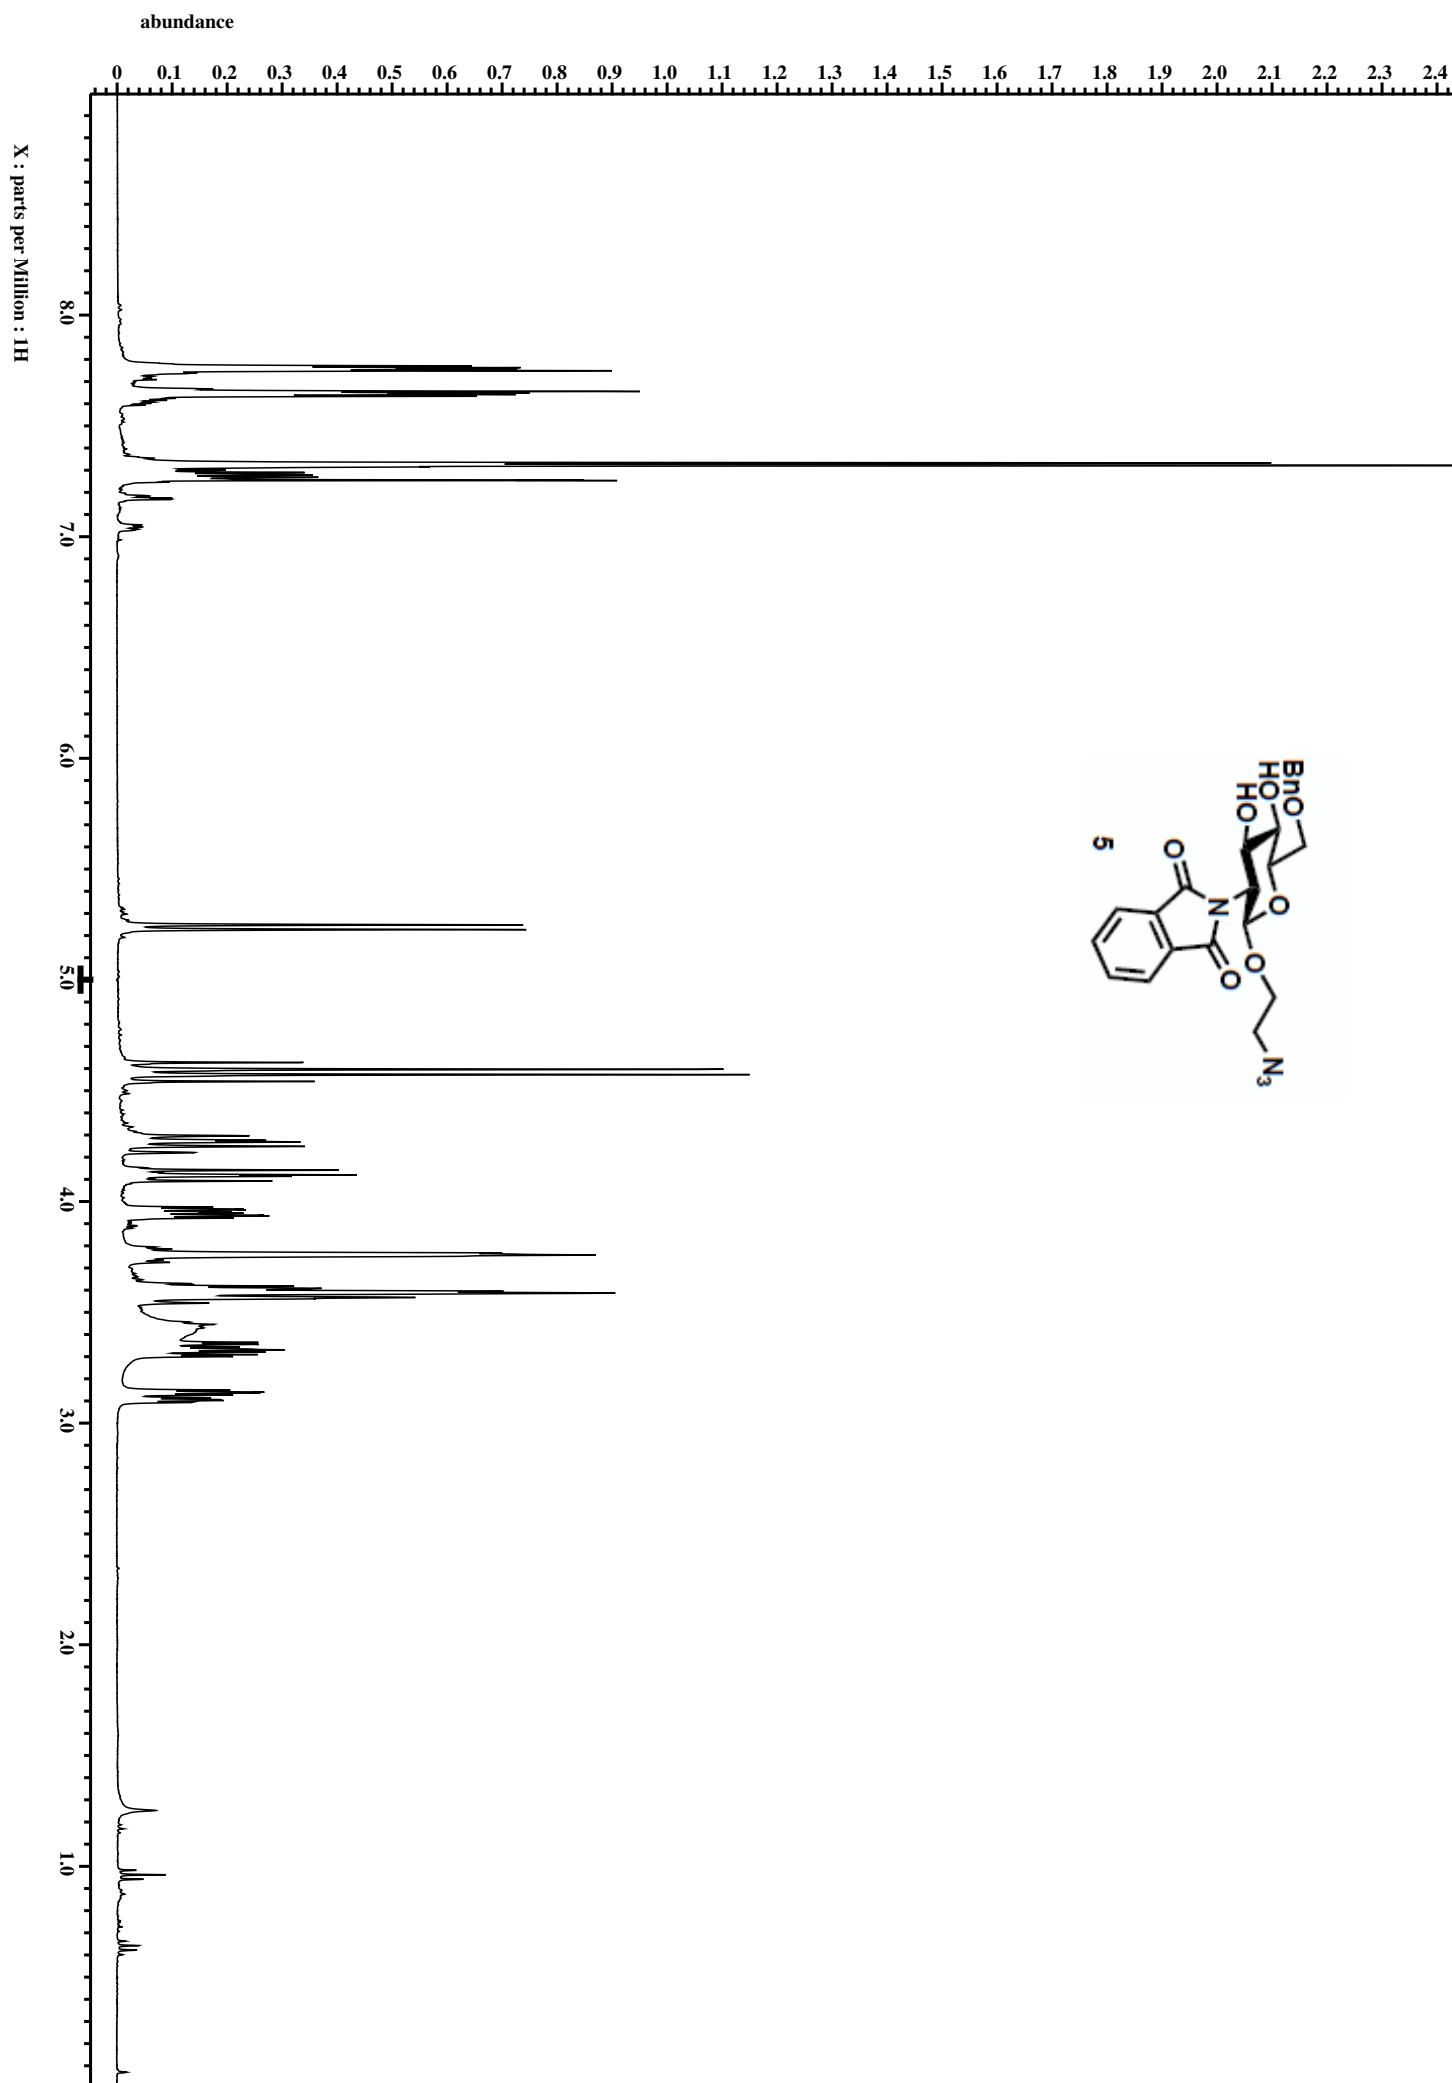

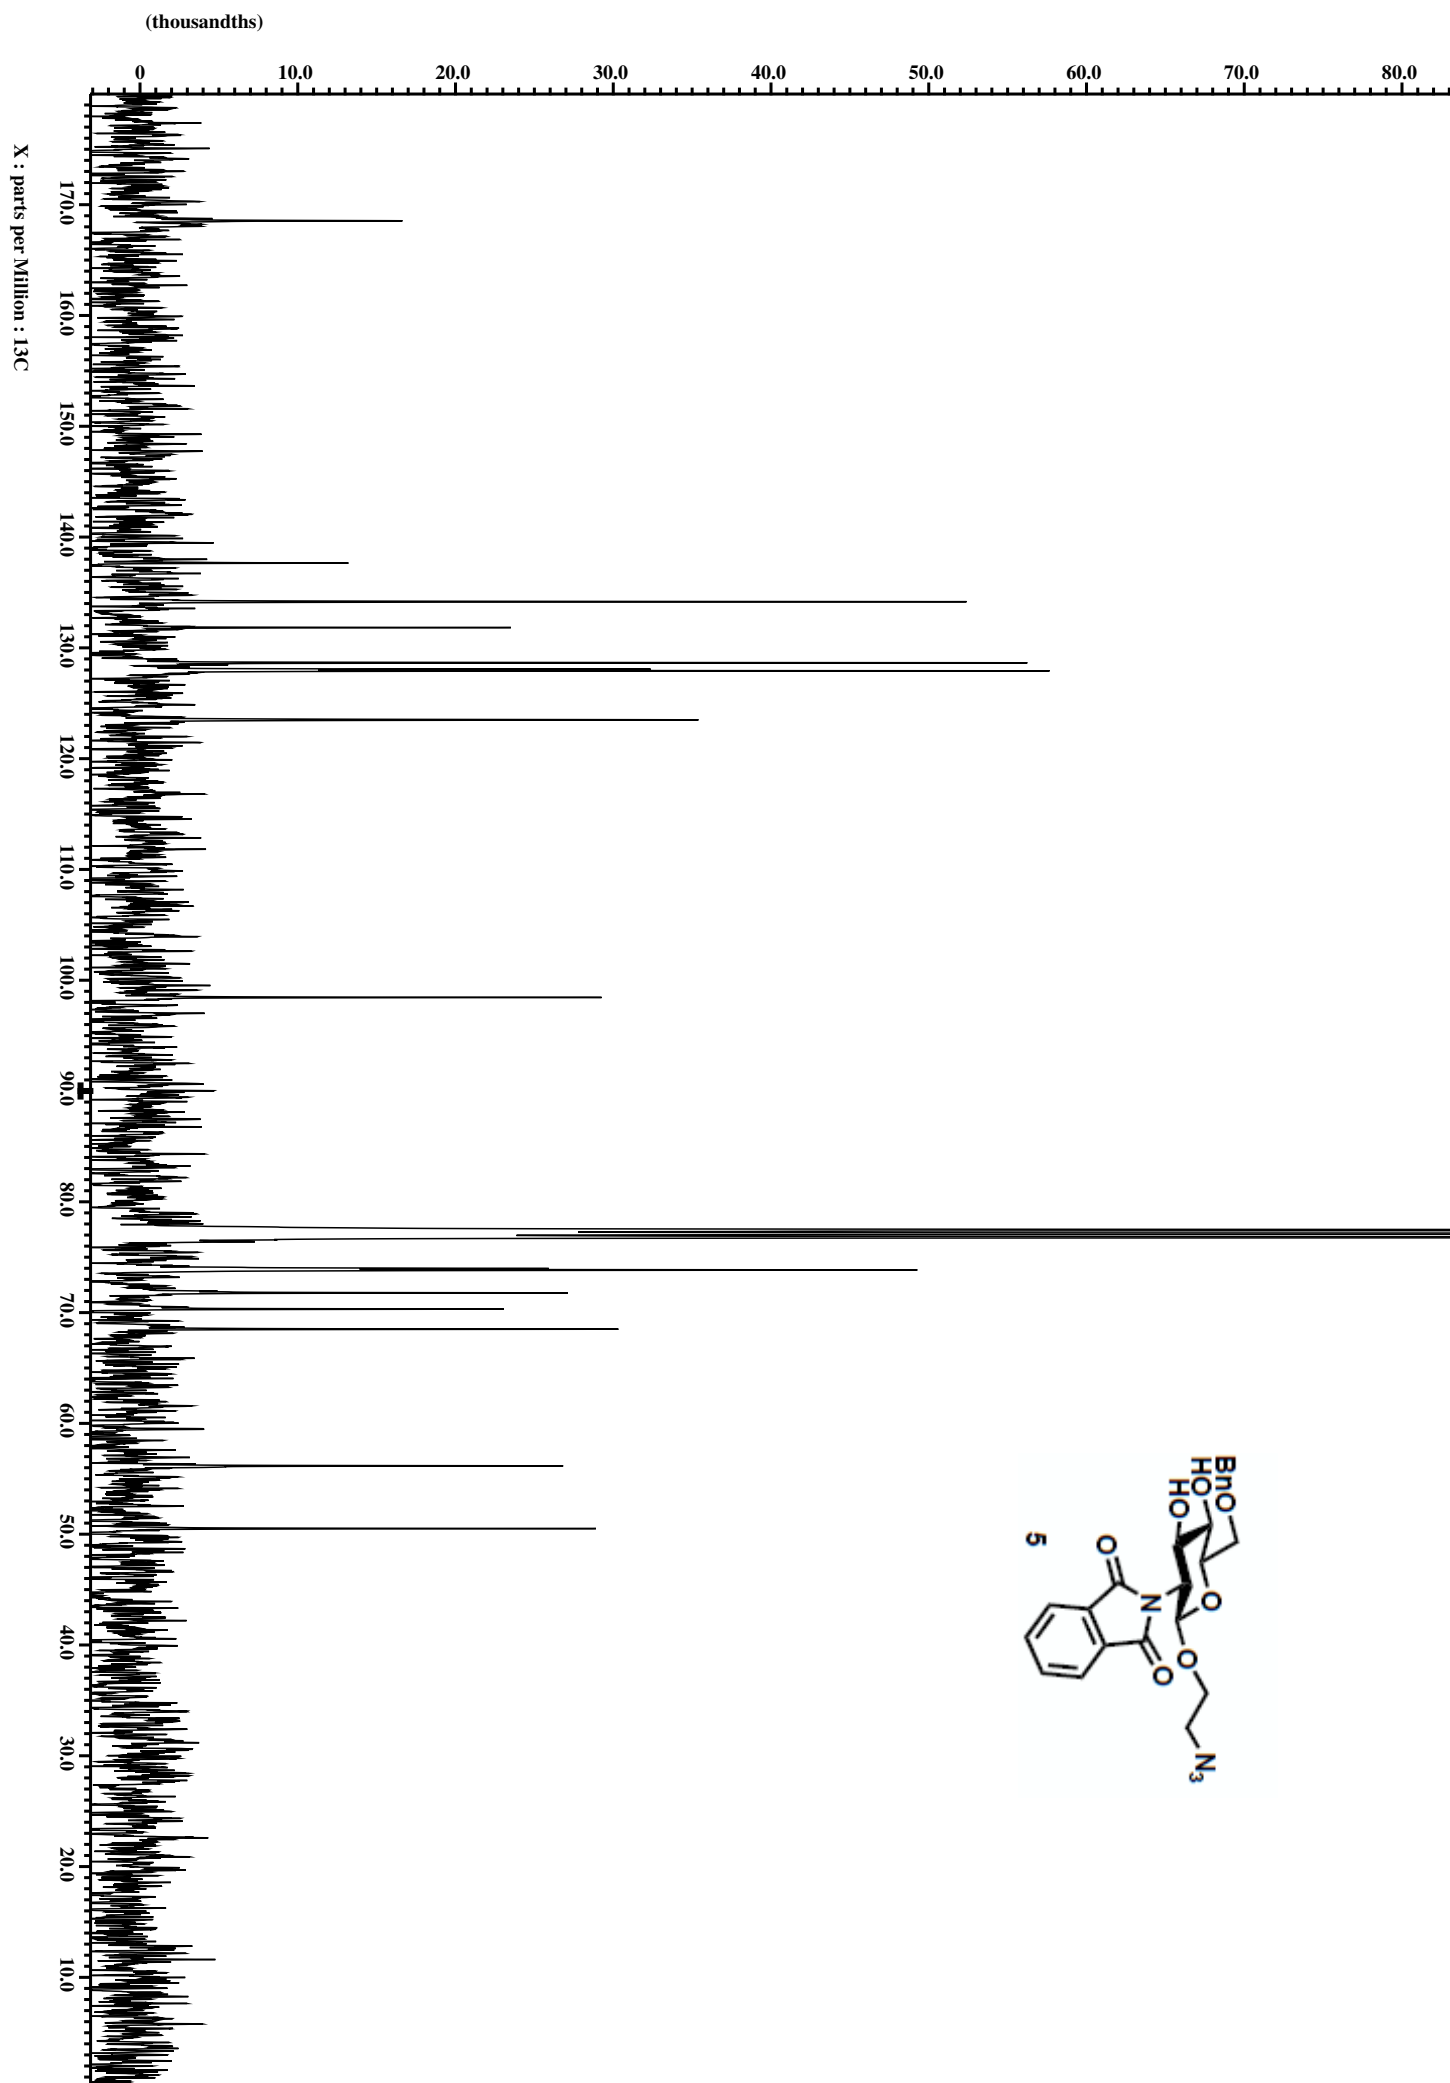

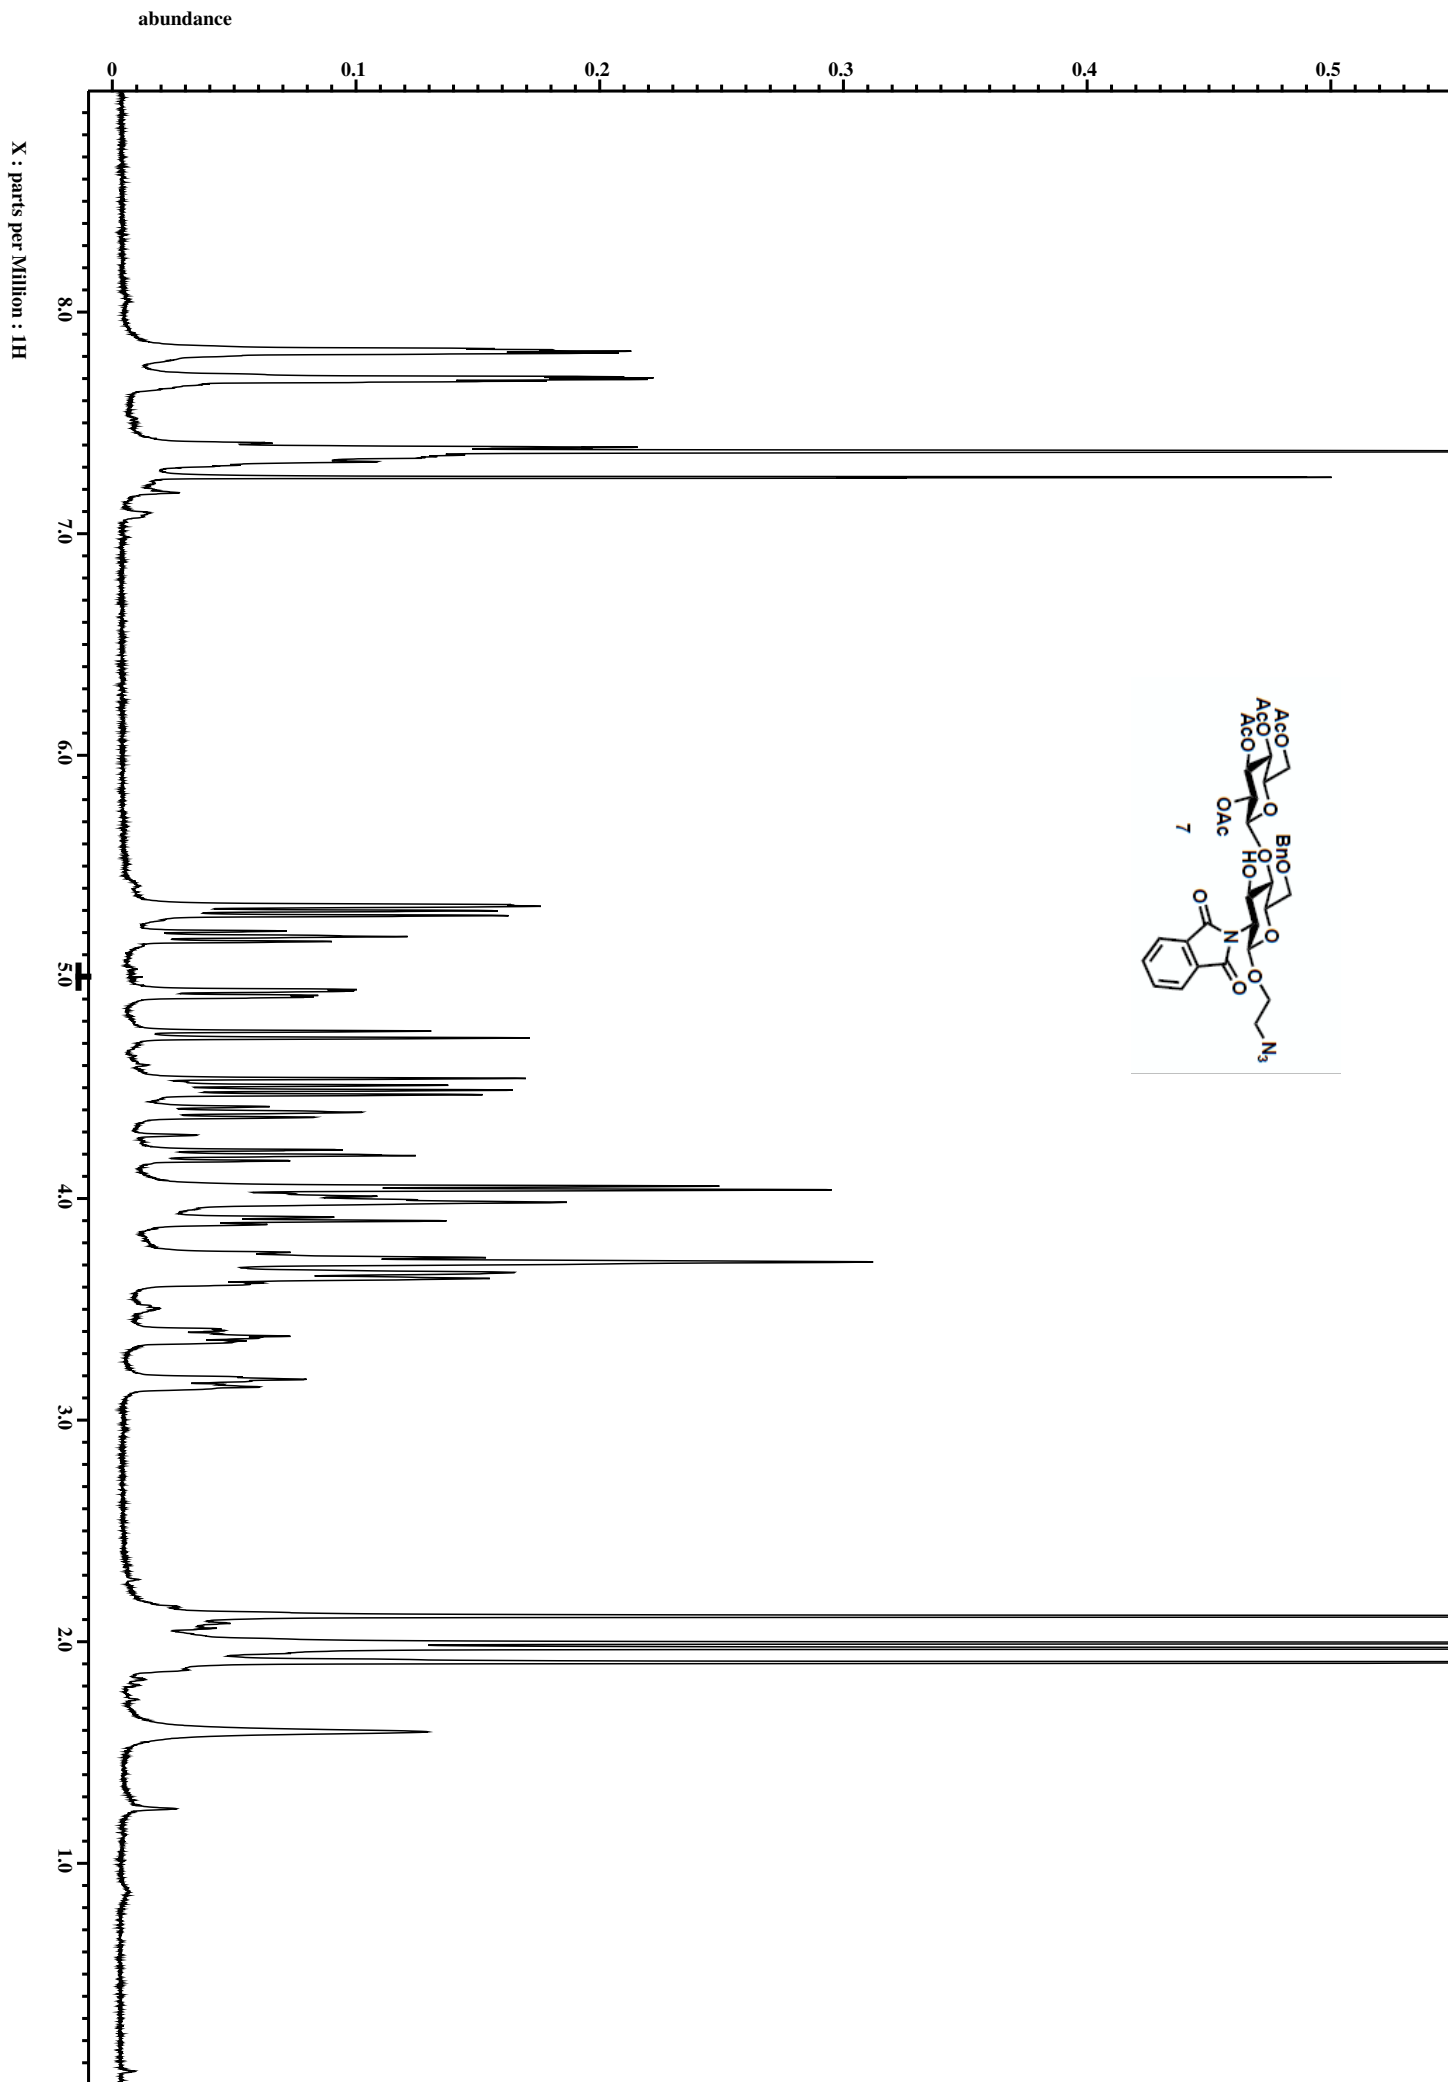

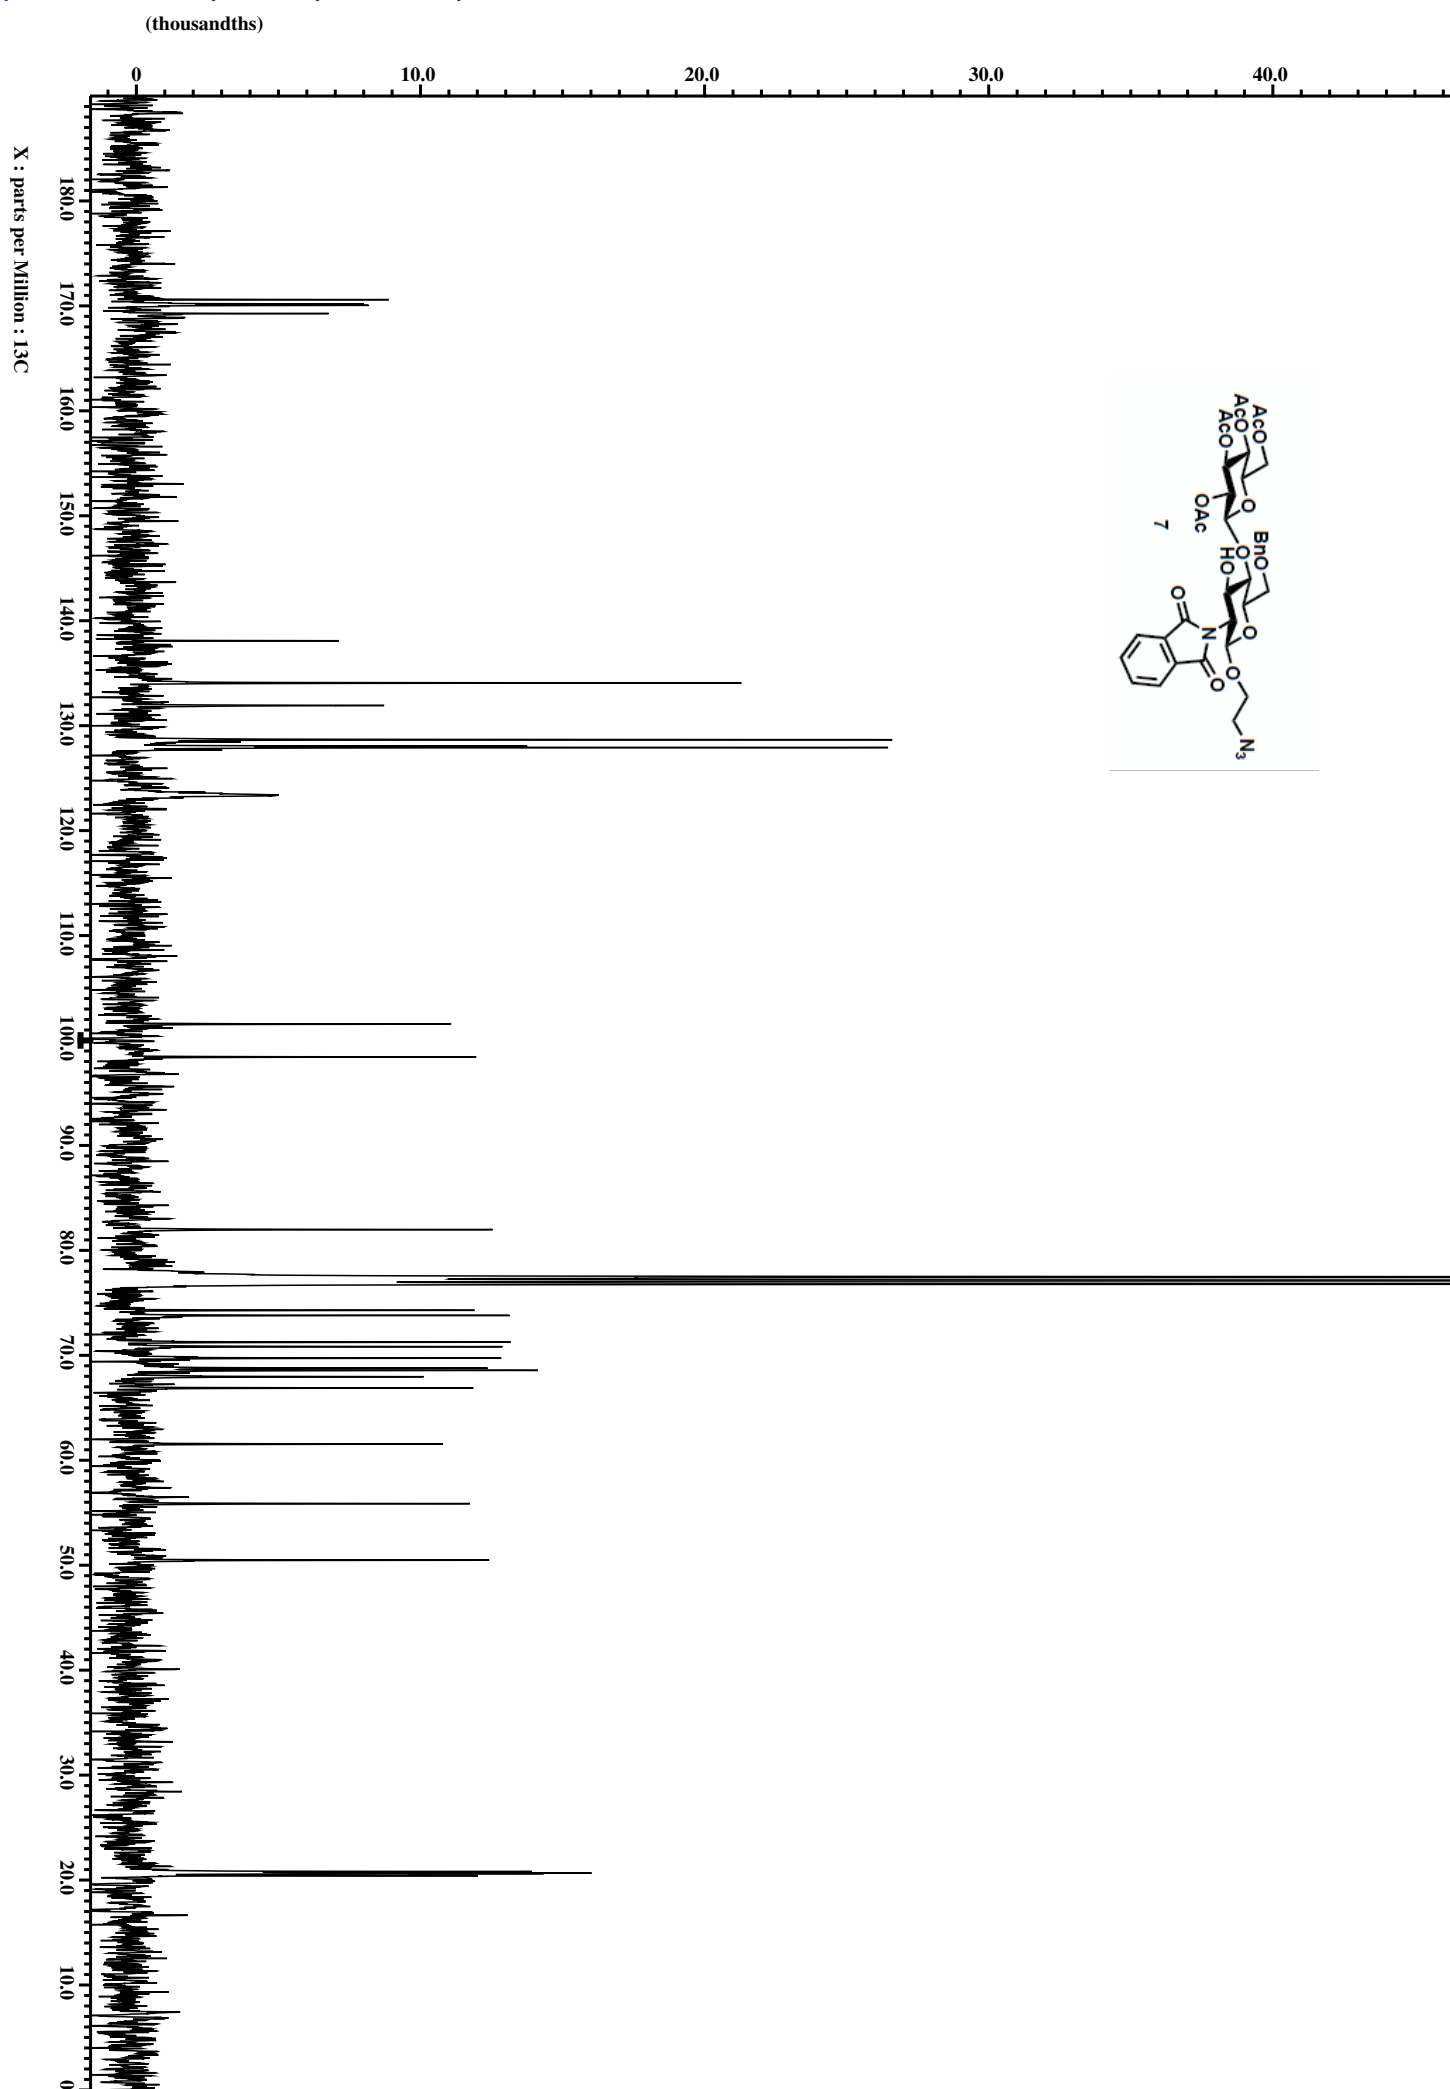





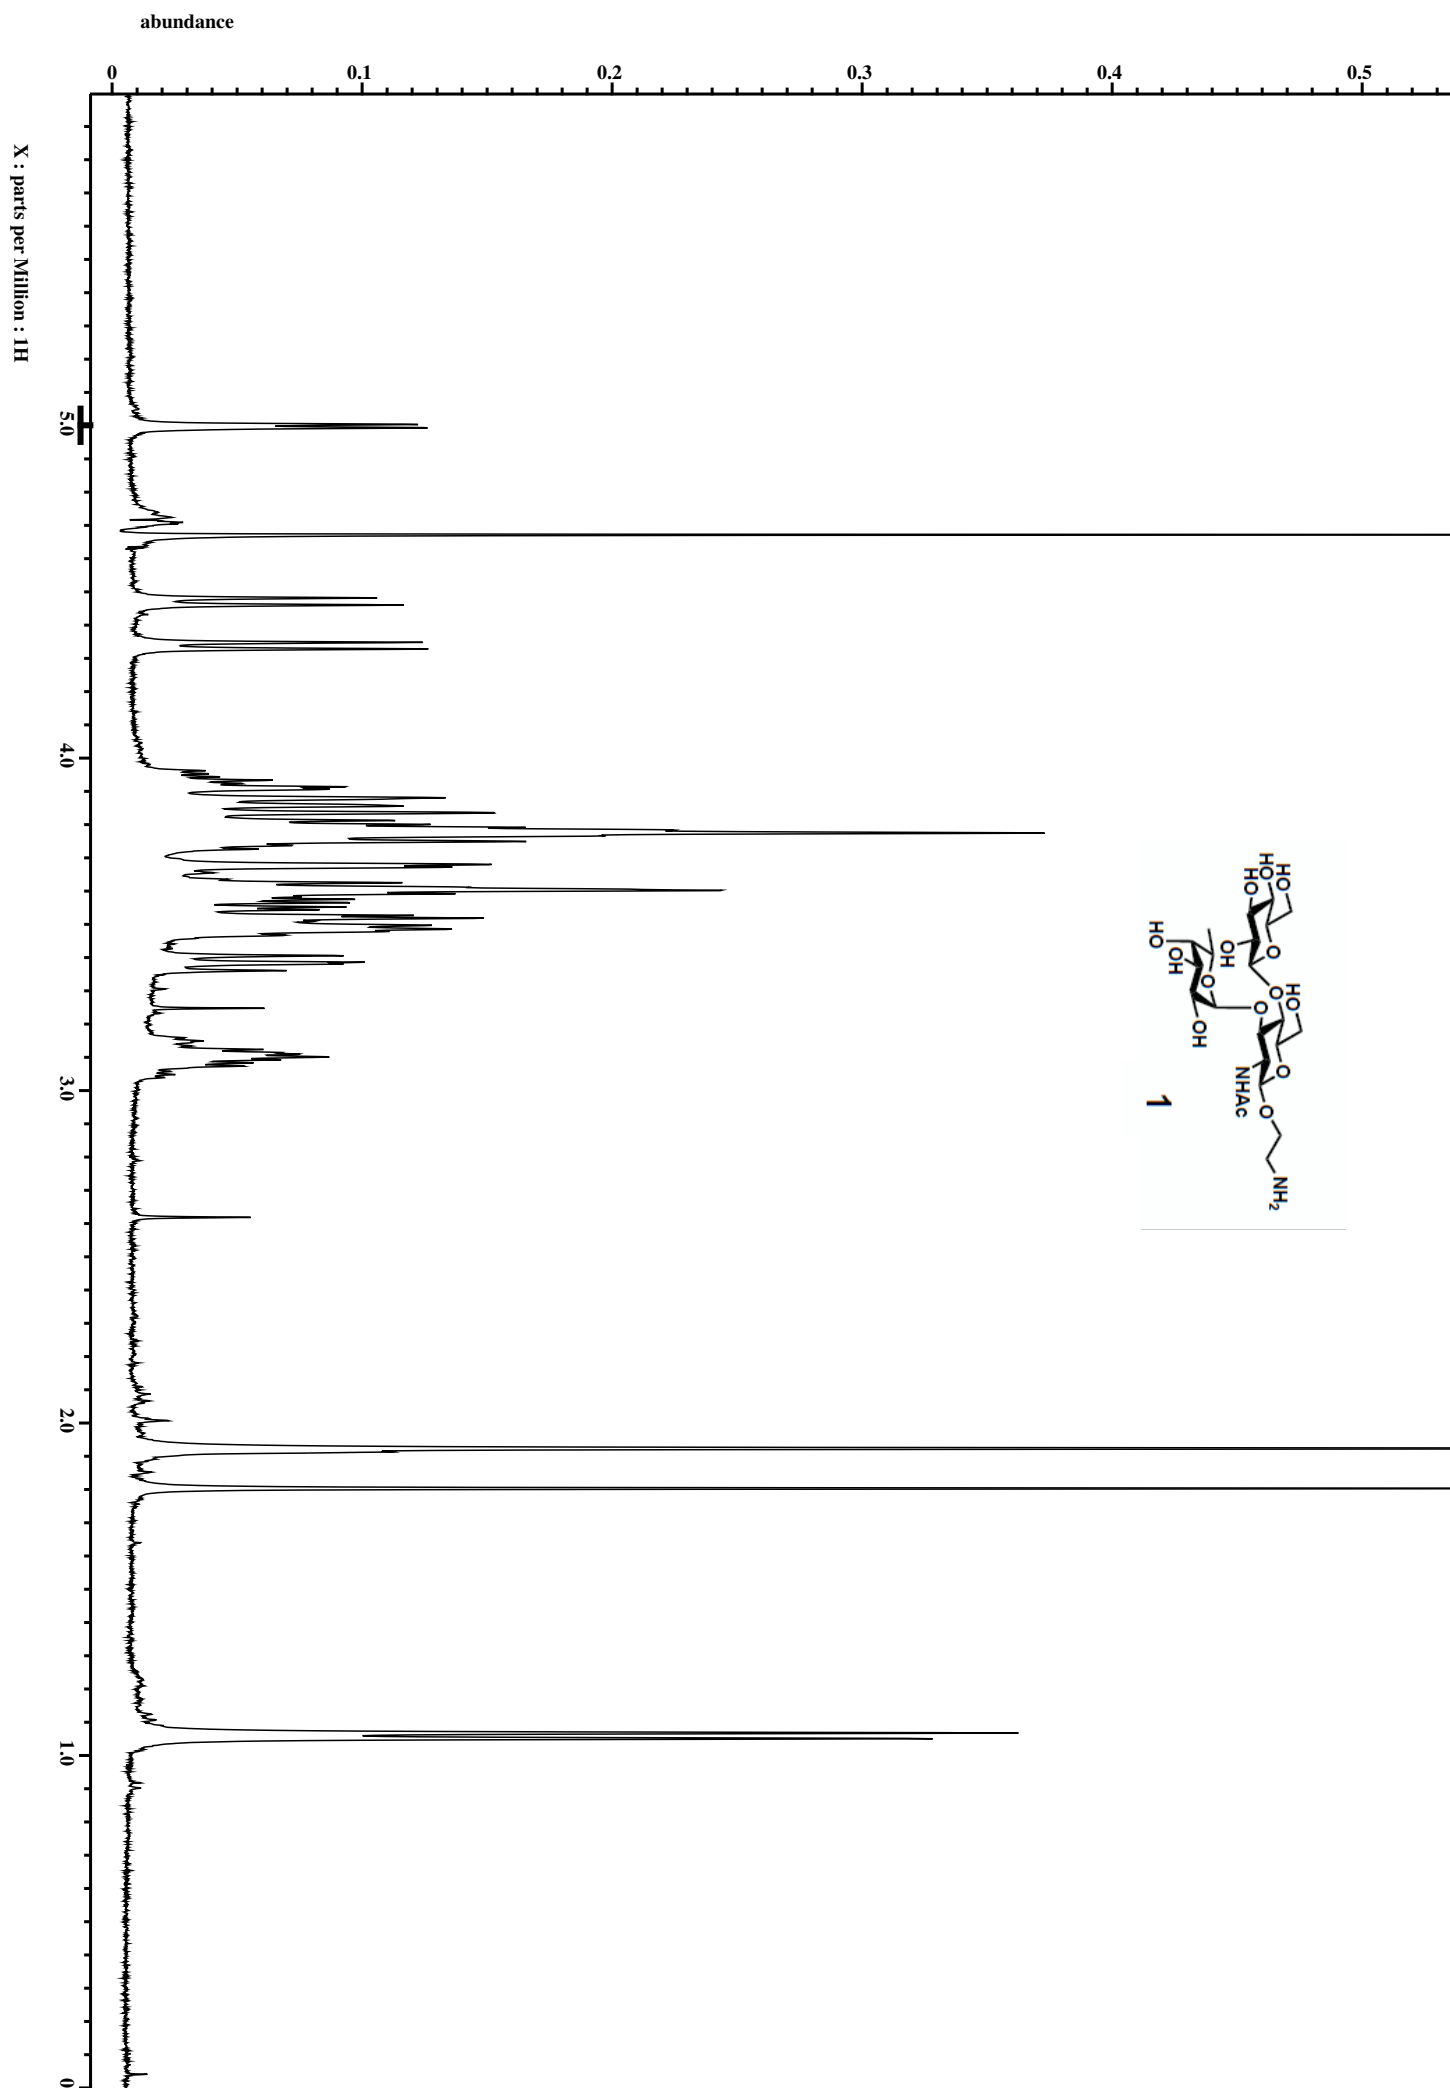



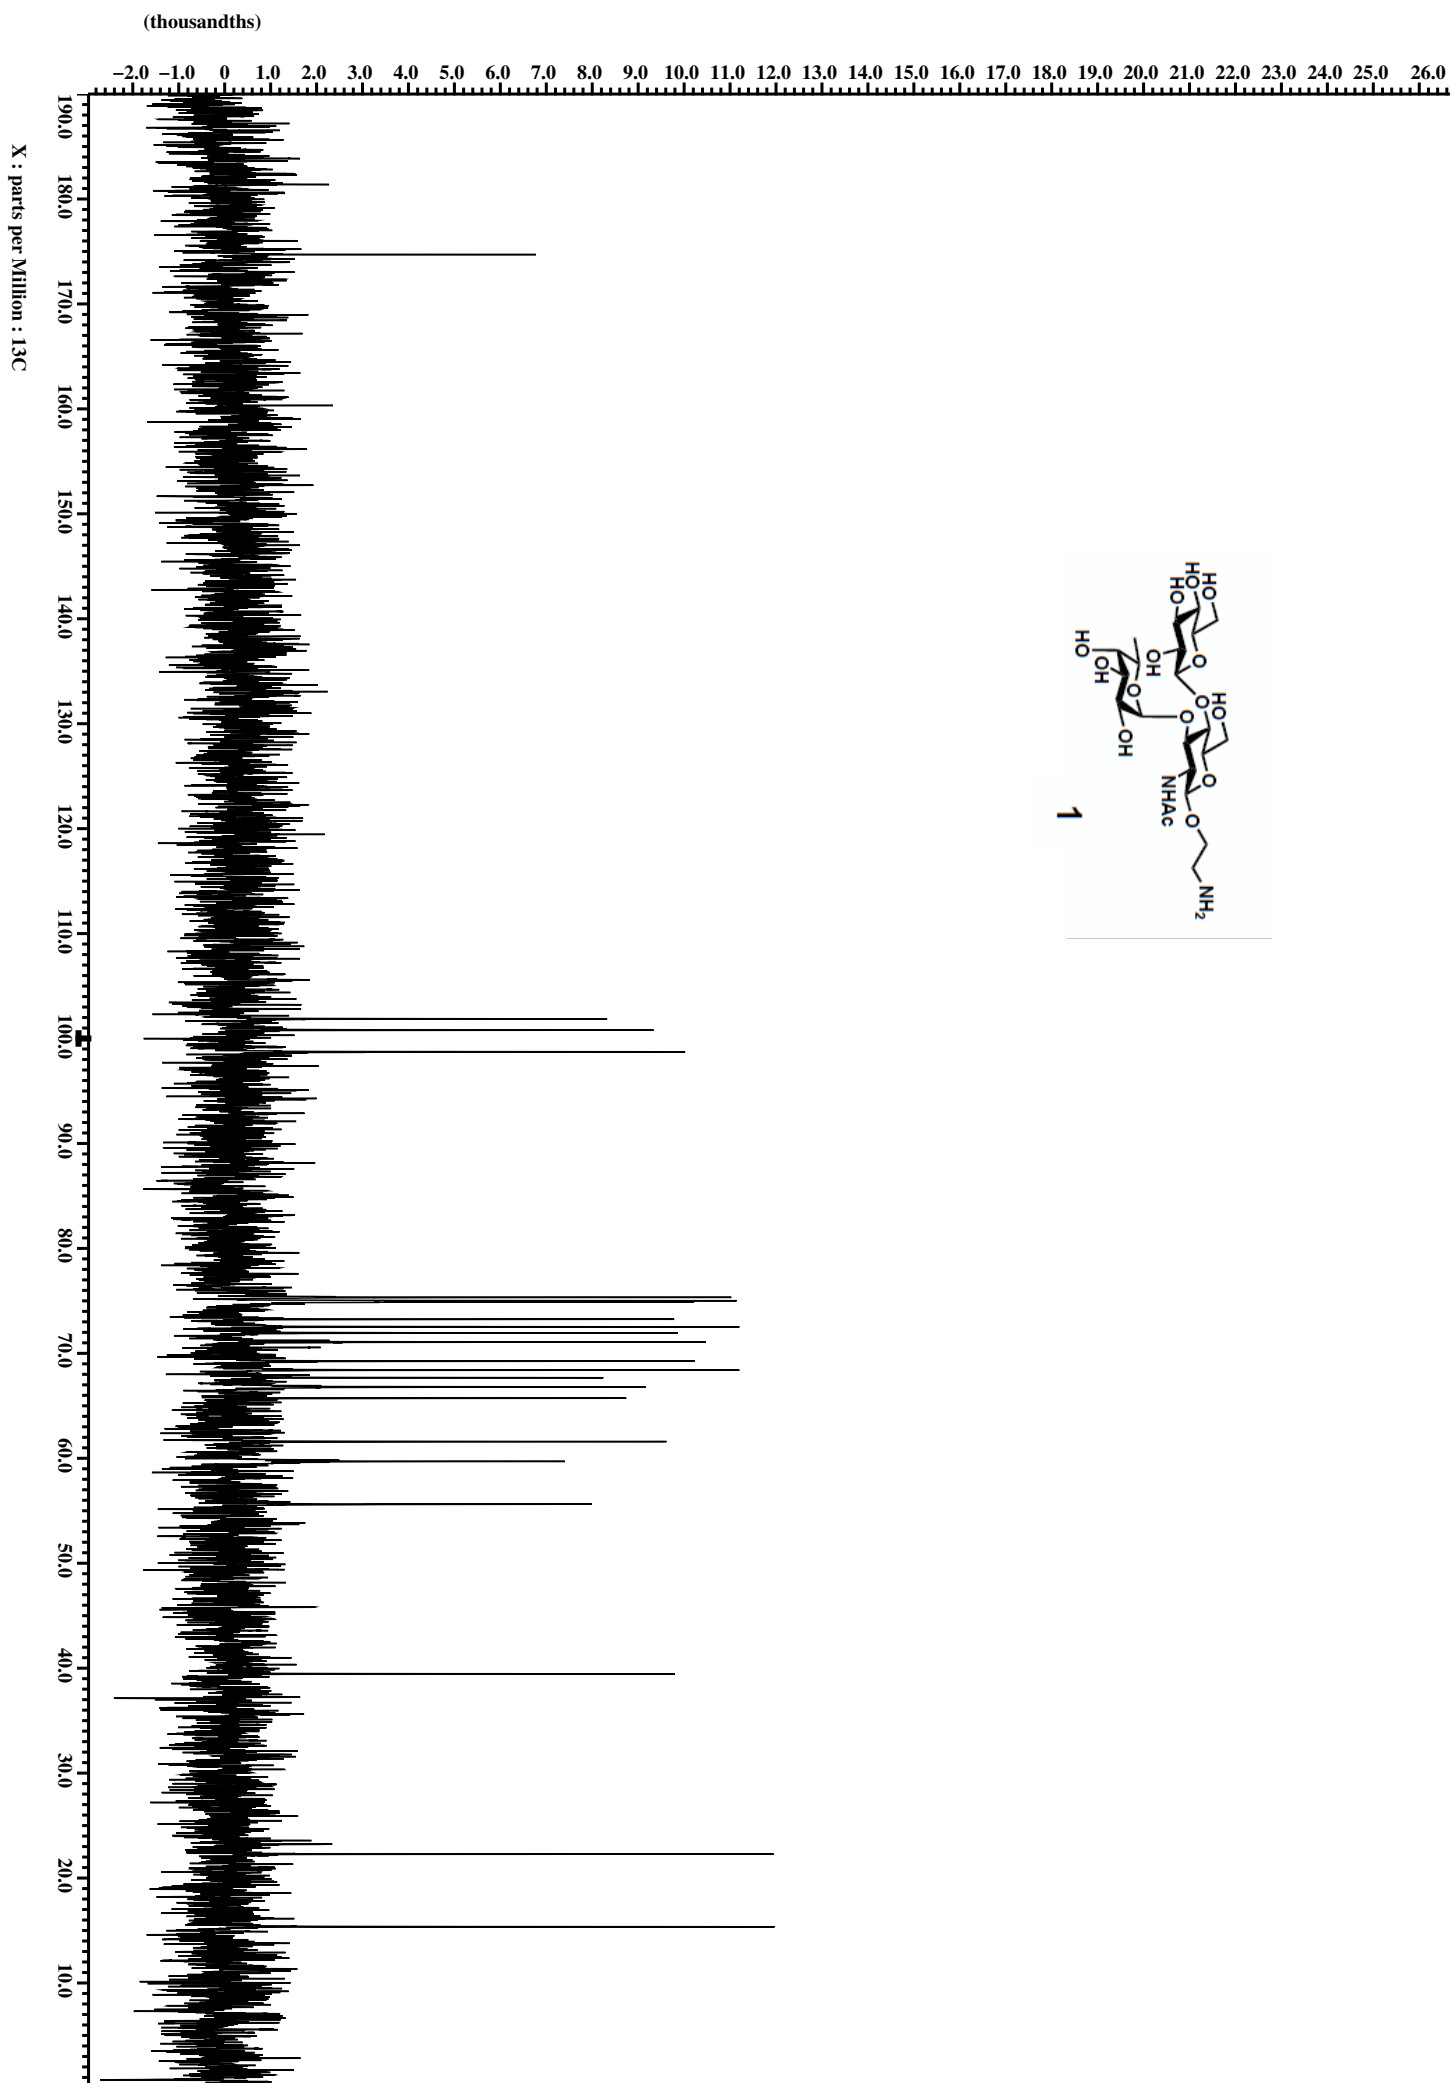

Supplement: c1cc13310a_2.pdf [file c1cc13310a_2.pdf]
